# Adherence to guidelines and registry data

Stefan Agewall

Editor-in-Chief, Oslo University Hospital Ullevål and Institute of Clinical Sciences, University of Oslo, Oslo, Norway

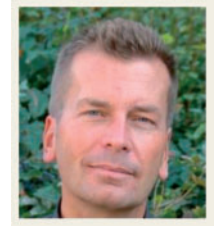

In this issue of the journal, Dr Claeys and co-workers from Belgium report real-world data in a multicentre study, evaluating the treatment persistence of oral antiplatelet (OAP) therapy during a 1-year follow-up in patients after an acute coronary syndrome (ACS). The proportion of patients still using OAPs after 90, 180, 270, and 360 days was 92, 89, 83, and 73%, respectively. OAP persistence was higher for patients treated with prasugrel or ticagrelor. At 360 days, 79% of patients with an ST-segment elevation myocardial infarction (STEMI) and 66% of patients with a non-STEMI were still adhering to the prescribed course of treatment. The results are important since several previous studies have shown that treatment adherence to guidelines and patient compliance are extremely important issues for the prognosis of patients within cardiology.<sup>1–3</sup>

In another study with a focus on adherence to international guidelines, Dr Giugliano and co-workers report a retrospective chart review designed to evaluate physician adherence to the prescribing information for fondaparinux regarding adjunctive anticoagulant use during percutaneous coronary intervention (PCI) in patients with an ACS. The study originates from 27 sites across six countries (Canada, France, Germany, Greece, Poland, and Sweden). Over 98% of patients had been treated with fondaparinux at the recommended 2.5 mg dose, and the authors conclude that physician adherence to the prescribing information for adjunctive anticoagulation during PCI in patients with an ACS receiving fondaparinux was high. The results were consistent in each of the six countries and across patient subgroups.

Dr Lettino and Dr Jukema report data from an European registry study.<sup>4–6</sup> The authors aimed to provide a descriptive overview of unadjusted analyses of patient characteristics, ACS management, and outcomes up to 1 year after hospital admission for an ACS/index ACS event, in patients with diabetes mellitus in contemporary registries in Europe. A total of 10 registries provided data in a systematic manner on ACS patients with (total  $n = 28\,899$ ) and without diabetes mellitus (total  $n = 97\,505$ ). All-cause mortality in the registries ranged from 1.4% to 9.4% in hospital; 2.8% to 7.9% at 30 days post-discharge; 5.1% to 10.7% at 180 days post-discharge; and 3.3% to 10.5% at 1 year post-discharge. Major bleeding events were reported in up to 3.8% of patients while in hospital (eight registries); up to 1.3% at 30 days (data from two registries only), and 2.0% at 1 year (one registry only).

Registries differed substantially in terms of study setting, site, patient selection, definition, and schedule of endpoints, and use of various P2Y<sub>12</sub> inhibitors. Pooled risk ratios comparing cohorts with diabetes mellitus vs. no diabetes mellitus were significantly higher in hospital with diabetes mellitus for all-cause death [1.66; 95% confidence interval (CI) 1.42–1.94], for cardiovascular death (2.33; 95% CI 1.78–3.03), and for major bleeding (1.35; 95% CI 1.21–1.52). These registry data from real-life clinical practice confirm a high risk for recurrent events among diabetes mellitus patients with ACS, with great variation across the different registries.

In a multicentre review paper, Dr Siller-Matula and co-workers discuss the role of diagnostic tools such as platelet function and pharmacogenomic testing to personalize antiplatelet therapy. The authors conclude that although the biological underpinnings and observational data supporting personalization are robust, more evidence is needed to recommend personalization as standard of care. This important issue has previously been discussed in the journal.<sup>7,8</sup>

Finally we publish a Consensus document from the European Heart Rhythm Association (EHRA) and ESC Council on Hypertension, endorsed by the Heart Rhythm Society (HRS), Asia-Pacific Heart Rhythm Society (APHRS), and Sociedad Latinoamericana de Estimulación Cardíaca y Electrofisiología (SOLEACE). Hypertension is a common cardiovascular risk factor leading to heart failure, coronary artery disease, stroke, peripheral artery disease, and chronic renal failure. Hypertensive heart disease can manifest as many types of cardiac arrhythmias, the most common being atrial fibrillation. The authors review the available evidence and publish a joint consensus document on hypertension and cardiac arrhythmias, providing up to date consensus recommendations for use in clinical practice. This consensus document is commented on in an Editorial by Dr Kjeldsen from Norway. Atrial fibrillation and hypertension have also been discussed previously in the journal.<sup>9–13</sup>

## References

1. Mehran R, Baber U, Steg PG, Ariti C, Weisz G, Witzensichler B, Henry TD, Kinn AS, Stuckey T, Cohen DJ, Berger PB, Iakovou I, Dangas G, Waksman R, Antoniucci D, Sartori S, Krucoff MW, Hermiller JB, Shawl F, Gibson CM, Chieffo A, Alu M, Moliterno DJ, Colombo A, Pocock S. Cessation of dual antiplatelet treatment and cardiac events after percutaneous coronary intervention (PARIS): 2 year results from a prospective observational study. *Lancet* 2013;**382**: 1714–1722.

2. Witt CT, Kronborg MB, Nohr EA, Mortensen PT, Gerdes C, Nielsen JC. Optimization of heart failure medication after cardiac resynchronization therapy and the impact on long-term survival. *Eur Heart J Cardiovasc Pharmacother* 2015;**1**:182–188.
3. De Blois J, Fagerland MW, Grundtvig M, Semb AG, Gullestad L, Westheim A, Hole T, Atar D, Agewall S. ESC guidelines adherence is associated with improved survival in patients from the Norwegian Heart Failure Registry. *Eur Heart J Cardiovasc Pharmacother* 2015;**1**:31–36.
4. Zeymer U, Widimsky P, Danchin N, Lettino M, Bardaji A, Barrabes JA, Cequier A, Claeys MJ, De Luca L, Dörlner J, Erlinge D, Erne P, Goldstein P, Koul SM, Lemesle G, Lüscher TF, Matter CM, Montalescot G, Radovanovic D, Sendón JL, Tousek P, Weidinger F, Weston CF, Zaman A, Andell P, Li J, Jukema JW; PIRAEUS group. P2Y12 receptor inhibitors in patients with non-ST-elevation acute coronary syndrome in the real world: use, patient selection, and outcomes from contemporary European registries. *Eur Heart J Cardiovasc Pharmacother* 2016;**2**:229–243.
5. Danchin N, Lettino M, Zeymer U, Widimsky P, Bardaji A, Barrabes JA, Cequier A, Claeys MJ, De Luca L, Dörlner J, Erlinge D, Erne P, Goldstein P, Koul SM, Lemesle G, Lüscher TF, Matter CM, Montalescot G, Radovanovic D, Lopez Sendón J, Tousek P, Weidinger F, Weston CF, Zaman A, Andell P, Li J, Jukema JW; PIRAEUS group. Use, patient selection, and outcomes of P2Y12 receptor inhibitor treatment in patients with STEMI based on contemporary European registries. *Eur Heart J Cardiovasc Pharmacother* 2016;**2**:152–167.
6. Jukema JW, Lettino M, Widimský P, Danchin N, Bardaji A, Barrabes JA, Cequier A, Claeys MJ, De Luca L, Dörlner J, Erlinge D, Erne P, Goldstein P, Koul SM, Lemesle G, Lüscher TF, Matter CM, Montalescot G, Radovanovic D, Lopez-Sendón J, Tousek P, Weidinger F, Weston CF, Zaman A, Zeymer U; PIRAEUS group. Contemporary registries on P2Y12 inhibitors in patients with acute coronary syndromes in Europe: overview and methodological considerations. *Eur Heart J Cardiovasc Pharmacother* 2015;**1**:232–244.
7. Vries MJ, Bouman HJ, Olie RH, Veenstra LF, Zwaveling S, Verhezen PW, Ten Cate-Hoek AJ, Ten Cate H, Henskens YM, van der Meijden PE. Determinants of agreement between proposed therapeutic windows of platelet function tests in vulnerable patients. *Eur Heart J Cardiovasc Pharmacother* 2017;**3**:11–17.
8. Sabouret P, Rushton-Smith SK, Kerneis M, Silvain J, Collet JP, Montalescot G. Dual antiplatelet therapy: optimal timing, management, and duration. *Eur Heart J Cardiovasc Pharmacother* 2015;**1**:198–204.
9. Agewall S, Camm J. New ESC/EACTS Guidelines for the management of atrial fibrillation. *Eur Heart J Cardiovasc Pharmacother* 2017;**3**:71–72.
10. Shahid F, Shantsila E, Lip GY. Atrial fibrillation and its complications: a focus on identifying risk factors and risk stratification. *Eur Heart J Cardiovasc Pharmacother* 2016;**2**:88–99.
11. Johnson LS, Juhlin T, Engström G, Nilsson PM. Risk factor changes and incident atrial fibrillation among middle-aged men in the Malmö Preventive Project cohort. *Eur Heart J Cardiovasc Pharmacother* 2016;**2**:81–87.
12. Lip GY. Stroke prevention in atrial fibrillation: changing concepts. *Eur Heart J Cardiovasc Pharmacother* 2015;**1**:76–79.
13. Dogliotti A, Giugliano RP. A novel approach indirectly comparing benefit–risk balance across anti-thrombotic therapies in patients with atrial fibrillation. *Eur Heart J Cardiovasc Pharmacother* 2015;**1**:15–28.
